# Supplementary material
Source: Springer Nature journal article supplement (https://www.springermedizin.de/resource/supplementary/12914_2011_195_MOESM7_ESM.pdf/9537026)

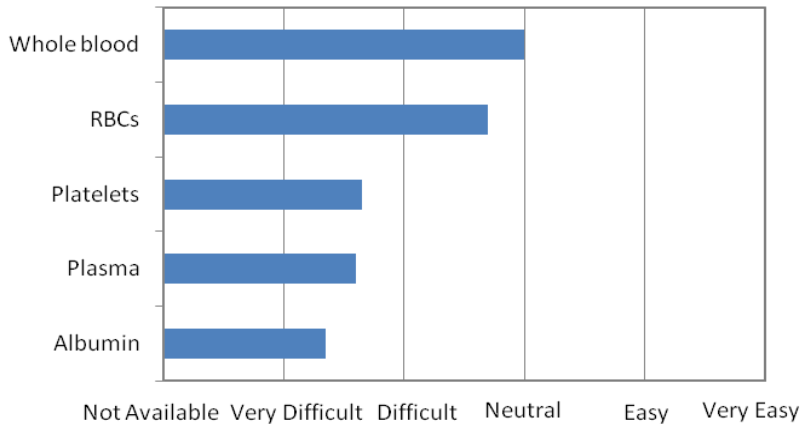

Supplement: MOESM7 [file 9537026]
